# Supplementary material for: Human perivascular stem cell-derived extracellular vesicles mediate bone repair
Source: eLife. 2019 Sep 4;8:e48191. doi: 10.7554/eLife.48191 (PMC6764819; doi:10.7554/eLife.48191)
Supplement: Supplementary file 4. [file elife-48191-supp4.xlsx]

## Sheet: 工作表1
Supplementary File 4: Highest 100 transcripts in human PSC-EVs.
Gene symbol	Mean FPKM (PSC-EVs)
FTL	11.2402
RAB13	10.9716
MT2A	10.6852
VIM	10.6198
FTH1	10.5229
LOC112268284	10.4429
TMSB10	10.3549
RPS18	10.3107
ACTB	10.1851
RPL37A	10.1727
S100A6	10.1568
LGALS1	10.0685
GAPDH	10.0208
EEF1A1	10.0193
RPL41	10.003
TMSB4X	9.80642
RPS2	9.79864
ACTG1	9.44612
RPLP1	9.42206
RPLP0	9.36314
RPS11	9.27627
NCL	9.18519
RPS12	9.17935
RPL7A	9.04281
RPL13A	9.02561
RPL12	8.93743
RPL39	8.91943
RPS6	8.9179
RPS8	8.91497
RPS27	8.90832
RPLP2	8.89802
RPS17	8.89645
MYL6	8.88972
RPL4	8.88359
RPS4X	8.87984
EEF2	8.84661
RPL35	8.81731
MAP4K4	8.8095
RPL38	8.7982
RPL18A	8.77141
RPL19	8.77011
EEF1G	8.75571
RPL3	8.73184
RACK1	8.72216
RPL23	8.63434
TRAK2	8.55861
NPM1	8.5583
KIF1C	8.54717
RPL23A	8.52325
RPL21	8.4815
RPL8	8.43219
RPS25	8.42214
RPL14	8.40563
ANP32B	8.39768
RPSA	8.38569
TUBA1B	8.36772
RPS14	8.35968
RPL30	8.34454
RPS7	8.20588
TGFBI	8.20472
RPL36	8.196
RPL29	8.19403
CCND1	8.15543
RPL24	8.15329
RPS15A	8.14007
RPL11	8.11406
RPS10	8.10387
RPL35A	8.08955
RPS13	8.0862
RPS5	8.07699
PABPC1	8.04609
CAVIN1	8.03936
RPL10A	8.00205
S100A11	7.99366
RPS19	7.95412
RPS15	7.90954
RPL5	7.90862
RPL17	7.87897
RPL26	7.87627
ANXA2	7.86196
RPL7	7.85259
EIF3A	7.83738
HNRNPA1	7.83521
RPL9	7.83212
RPL18	7.82203
MAP1B	7.81459
CFL1	7.73266
RPS16	7.71942
RPL27	7.7069
EIF4A1	7.69389
PKM	7.68245
TUBB	7.68235
ENO1	7.65799
RPL37	7.65706
HSPA8	7.65501
S100A4	7.64859
RPS28	7.61862
RPS9	7.61288
HSP90AB1	7.57217
DYNC1LI2	7.54502
FPKM: fragments per kilobasepair per million mapped
