# Supplementary material for: Human perivascular stem cell-derived extracellular vesicles mediate bone repair
Source: eLife. 2019 Sep 4;8:e48191. doi: 10.7554/eLife.48191 (PMC6764819; doi:10.7554/eLife.48191)
Supplement: Supplementary file 5. [file elife-48191-supp5.xlsx]

## Sheet: Sheet1
Supplementary File 5: Relative gene expression within human PSC-EV or parent PSC among transcription factors enriched in porcine ASC-EVs
Gene symbol	Mean FPKM (PSC-EVs)	Mean FPKM (PSCs)	PSC-EVs vs. PSC Log2 (FC)
FOXP3	-5.15703	-7.2909	2.90554
IFT57	2.43015	1.927	0.551947
BAZ2B	1.36304	1.0675	0.299246
KDM6B	-0.675745	-1.16157	0.2933
MXD1	-0.840247	-0.884492	0.100397
SNAPC1	0.520974	0.444441	0.0180527
MDFIC	1.94989	1.80172	-0.0598014
PEG3	-4.44967	-3.90653	-0.074152
ZBTB1	-1.8751	-1.39518	-0.0761056
JARID2	-0.348094	-0.159877	-0.118798
MDM4	0.85941	1.05766	-0.173409
ZHX1	-1.89326	-1.66998	-0.200255
TMF1	2.07692	2.39952	-0.306759
SKIL	0.512512	0.835988	-0.500638
MYNN	-0.57885	0.064309	-0.61029
HES1	-0.761187	-0.264175	-0.694765
SUFU	-0.302635	0.0112795	-0.757834
SSBP2	-0.128464	0.610875	-0.856476
LCORL	-1.94084	-1.31031	-0.874432
KLF7	0.063223	0.78865	-0.90647
TRPS1	0.144492	1.36958	-1.27831
RUNX1T1	-1.37751	-0.140288	-1.3305
PDCD4	2.20787	3.40697	-1.40105
NFKBIZ	-1.0079	0.214392	-1.49214
POU3F1	-4.98976	-5.50246	-1.50775
JMJD1C	0.799237	2.60474	-1.73189
NRIP1	0.574765	2.42539	-1.8138
ZNF568	-2.19457	-0.824828	-1.83554
CREG1	2.29222	4.0894	-1.85994
CEBPA	-1.9574	-0.769629	-2.06889
TCF4	0.742598	3.04396	-2.31796
RBAK	-1.39444	0.413195	-2.3815
HIVEP1	-1.08562	0.989273	-2.41415
ZNF461	-3.48859	-1.56765	-2.95616
ZNF667	-3.73138	-1.15523	-3.21741
ZNF217	-0.947882	1.90887	-3.26776
PROX2	-5.49778	---	---
KCNH6	---	---	---
IL17REL	---	---	---
FPKM: fragments per kilobasepair per million mapped
