# Supplementary material for: Human perivascular stem cell-derived extracellular vesicles mediate bone repair
Source: eLife. 2019 Sep 4;8:e48191. doi: 10.7554/eLife.48191 (PMC6764819; doi:10.7554/eLife.48191)
Supplement: Supplementary file 6. [file elife-48191-supp6.xlsx]

## Sheet: Sheet1
Supplementary File 6: Most upregulated pathways among PSC-EV treated BMSC by Ingenuity Pathway Analysis.
Pathway	Z score	Negative log P value
SAPK/JNK Signaling	1.667	0.941
Aryl Hydrocarbon Receptor Signaling	1.633	0.585
HGF Signaling	1.633	0.297
Macropinocytosis Signaling	1.342	0.472
CDK5 Signaling	1.342	0.296
Sirtuin Signaling Pathway	1.279	1.67
D-myo-inositol-5-phosphate Metabolism	1.265	0.39
RhoGDI Signaling	1.155	0.833
FGF Signaling	1.134	0.547
Rac Signaling	1.134	0.281
3-phosphoinositide Biosynthesis	1.069	0.617
tRNA Splicing	1	0.638
Role of Pattern Recognition Receptors in Recognition of Bacteria and Viruses	1	0.443
D-myo-inositol (1,4,5,6)-Tetrakisphosphate Biosynthesis	1	0.405
EGF Signaling	1	0.254
Gαq Signaling	0.832	0.867
Role of CHK Proteins in Cell Cycle Checkpoint Control	0.816	1.36
Activation of IRF by Cytosolic Pattern Recognition Receptors	0.816	0.836
LPS-stimulated MAPK Signaling	0.816	0.397
PDGF Signaling	0.816	0.374
Superpathway of Inositol Phosphate Compounds	0.775	0.453
NRF2-mediated Oxidative Stress Response	0.707	1.82
NF-κB Activation by Viruses	0.707	0.885
Acute Phase Response Signaling	0.707	0.286
3-phosphoinositide Degradation	0.632	0.426
TNFR1 Signaling	0.447	0.829
Cell Cycle: G2/M DNA Damage Checkpoint Regulation	0.447	0.777
LPS/IL-1 Mediated Inhibition of RXR Function	0.447	0.654
Toll-like Receptor Signaling	0.447	0.358
Paxillin Signaling	0.447	0.34
GDNF Family Ligand-Receptor Interactions	0.447	0.336
Neurotrophin/TRK Signaling	0.447	0.325
CD40 Signaling	0.447	0.315
Prolactin Signaling	0.447	0.268
JAK/Stat Signaling	0.447	0.268
Ceramide Signaling	0.378	1.09
Cyclins and Cell Cycle Regulation	0.378	1.04
STAT3 Pathway	0.378	0.493
ErbB Signaling	0.378	0.467
ATM Signaling	0.333	0.961
NGF Signaling	0.333	0.594
IL-6 Signaling	0.333	0.486
